# Supplementary material for: Differentiation of human colon tissue in culture: Effects of calcium on trans-epithelial electrical resistance and tissue cohesive properties
Source: PubMed Central journal article supplement (PMC7058309; doi:10.1371/journal.pone.0222058), 2020-03-05
Supplement: pone.0222058.s001.pdf [file pone.0222058.s001.pdf]

**S1 Table. Aquamin® Mineral Analysis.**

| <b>Element</b> | <b>µg/g</b> | <b>Element</b> | <b>µg/g</b> | <b>Element</b> | <b>µg/g</b> |
|----------------|-------------|----------------|-------------|----------------|-------------|
| Aluminum       | 21.6        | Hafnium        | 0.038       | Rubidium       | 0.031       |
| Antimony       | 0.69        | Holmium        | 0.010       | Ruthenium      | 0.137       |
| Arsenic        | 0.239       | Indium         | <0.001      | Samarium       | 0.037       |
| Barium         | 1.76        | Iodine         | 1.81        | Scandium       | 0.469       |
| Beryllium      | <0.5        | Iridium        | <0.001      | Selenium       | <0.5        |
| Bismuth        | <0.5        | Iron           | 143         | Silicon        | 16.8        |
| Boron          | 13.7        | Lanthanum      | <0.5        | Silver         | <0.5        |
| Cadmium        | 0.220       | Lead           | 0.084       | Sodium         | 2,206       |
| Calcium        | 117,000     | Lithium        | <0.5        | Strontium      | 882         |
| Carbon         | 26,600      | Lutetium       | <0.001      | Sulfur         | 1,241       |
| Cerium         | 0.314       | Magnesium      | 10,210      | Tantalum       | 0.043       |
| Cesium         | 0.001       | Manganese      | 25.4        | Tellurium      | <0.5        |
| Chloride       | 612         | Mercury        | <0.001      | Terbium        | 0.007       |
| Chromium       | <0.5        | Molybdenum     | <0.5        | Thallium       | <0.5        |
| Cobalt         | <0.5        | Neodymium      | 0.170       | Thorium        | 1.30        |
| Copper         | <0.5        | Nickel         | 0.75        | Thulium        | 0.004       |
| Dysprosium     | 0.045       | Niobium        | <0.5        | Tin            | 0.029       |
| Erbium         | 0.033       | Osmium         | <0.001      | Titanium       | 11.4        |
| Europium       | 0.013       | Palladium      | 0.179       | Tungsten       | <0.5        |
| Fluoride       | 3.57        | Phosphorous    | 189         | Vanadium       | <0.5        |
| Gadolinium     | 0.044       | Platinum       | <0.001      | Ytterbium      | 0.030       |
| Gallium        | 0.307       | Potassium      | 70.0        | Yttrium        | <0.5        |
| Germanium      | <0.001      | Praseodymium   | 0.040       | Zinc           | 6.07        |
| Gold           | <0.5        | Rhenium        | 0.001       | Zirconium      | <0.5        |
|                |             | Rhodium        | 0.061       |                |             |

Source: 2017 Test Certificate for Aquamin® Soluble, by Advanced Laboratories, Inc. (Salt Lake City), for client Marigot Limited (Ireland). The levels of individual trace elements were determined by Inductively Coupled Plasma Optical Emission Spectrometry (ICP-OES) except Carbon (determined by LECO), Chloride, Iodine (determined by Titration), and Fluoride (determined by AOAC 939.11).
