# Supplementary material for: Differentiation of human colon tissue in culture: Effects of calcium on trans-epithelial electrical resistance and tissue cohesive properties
Source: PubMed Central journal article supplement (PMC7058309; doi:10.1371/journal.pone.0222058), 2020-03-05
Supplement: pone.0222058.s002.pdf [file pone.0222058.s002.pdf]

## S2 Table. Antibody characteristics

### A. Confocal Microscopy Antibodies

| Antibody     | Company           | Catalog #       | Fluorochrome    | Staining Dilution |
|--------------|-------------------|-----------------|-----------------|-------------------|
| Cadherin-17  | Novus Biologicals | NBP2-12065AF488 | Alexa Fluor 488 | 1:200             |
| Claudin-4    | Invitrogen        | 329488          | Alexa Fluor 488 | 1:400             |
| Desmoglein-2 | eBioscience       | 53-9159-80      | Alexa Fluor 488 | 1:200             |
| Occludin     | Invitrogen        | 331594          | Alexa Fluor 594 | 1:400             |

### B. Western Blotting Antibodies

| Antibody     | Company        | Catalog # | Concentration | Secondary Ab                                  |
|--------------|----------------|-----------|---------------|-----------------------------------------------|
| Cadherin-17  | abcam          | Ab109190  | 0.166 µg/ml   | Invitrogen mouse anti-rabbit, HRP (cat#31464) |
| Claudin-2    | Invitrogen     | 32-5600   | 1.0 µg/ml     | Cell Signaling horse anti-mouse, HRP (7076S)  |
| Claudin-3    | Invitrogen     | 34-1700   | 1.0 µg/ml     | Invitrogen mouse anti-rabbit, HRP (cat#31464) |
| Claudin-4    | Invitrogen     | 32-9400   | 1.0 µg/ml     | Cell Signaling horse anti-mouse, HRP (7076S)  |
| Claudin-7    | Invitrogen     | 37-4800   | 1.0 µg/ml     | Cell Signaling horse anti-mouse, HRP (7076S)  |
| Desmoglein-2 | Invitrogen     | MA1-91589 | 1.0 µg/ml     | Cell Signaling horse anti-mouse, HRP (7076S)  |
| Occludin     | Invitrogen     | PA5-20755 | 1.0 µg/ml     | Invitrogen mouse anti-rabbit, HRP (cat#31464) |
| Beta-Actin   | Cell Signaling | 5125S     | 1:1000        | Invitrogen mouse anti-rabbit, HRP (cat#31464) |
